# Supplementary material for: Syntheses, structures, optical properties and biological activities of bimetallic complexes
Source: Royal Society of Chemistry journal article supplement (doi:10.1039/c4ra11991f), 2014-01-01
Supplement: c4ra11991f1.pdf [file c4ra11991f1.pdf]

## Electronic Supplementary Information

### Syntheses, Structures, Optical Properties and Biological activities of Bimetallic Complexes

**Mamata Mahato,<sup>a</sup> Dhriman Dey,<sup>b</sup> Souvik Pal,<sup>a</sup> Sudeshna Saha,<sup>a</sup>  
Abhrajyoti Ghosh,<sup>c</sup> Klaus Harms<sup>d</sup> and Hari Pada Nayek<sup>\*a</sup>**

*<sup>a</sup>Department of Applied Chemistry, Indian School of Mines, Dhanbad-826004, Jharkhand, India*

*<sup>b</sup>Department of Biochemistry, University of Calcutta, Kolkata-700019, West Bengal, India*

*<sup>c</sup>Department of Biochemistry, Bose Institute, Centenary Campus, Kolkata-700054, West Bengal, India*

*<sup>d</sup>Fachbereich Chemie, Philipps Universität Marburg, Hans Meerwein Strasse, Marburg, Germany*

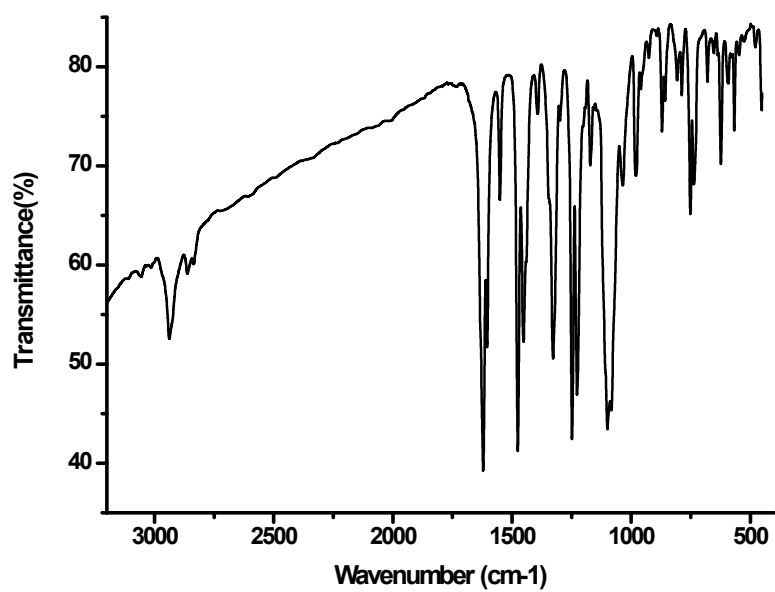

*Figure S1: IR spectrum of 1.*

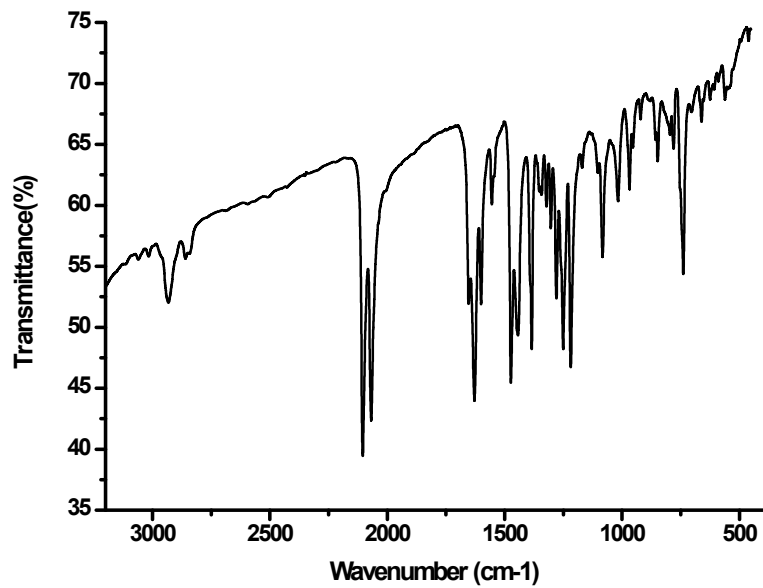

*Figure S2: IR spectrum of 2.*
